# Supplementary material for: Peranan Personal Selling Dalam Meningkatkan Volume Penjualan Pada Perusahaan Daerah Sarana Bangunan Unit Pabrik Batu Dan Semen Tahan Api LOKA Surabaya
Source: Royal Society of Chemistry journal article supplement (doi:10.1039/c6cp00372a), 1988-09-01
Supplement: c6cp00372a1.pdf [file c6cp00372a1.pdf]

## Electronic Supplementary Information

### **Photochemical fabrication of 3D hierarchical Mn<sub>3</sub>O<sub>4</sub>/H-TiO<sub>2</sub> composite films with excellent electrochemical capacitance performance**

Shasha Zhu, Peipei Zhang, Ling Chang, Yuan Zhong, Kai Wang, Haibo Shao, Jianming Wang\*, Jianqing Zhang,

Chu-nan Cao

Department of Chemistry, Zhejiang University, Hangzhou 310027, PR China

---

\*Corresponding author.

Tel.: +86-571-87951513; Fax: +86-571-87951895.

E-mail address: [wjm@zju.edu.cn](mailto:wjm@zju.edu.cn) (J.M. Wang)

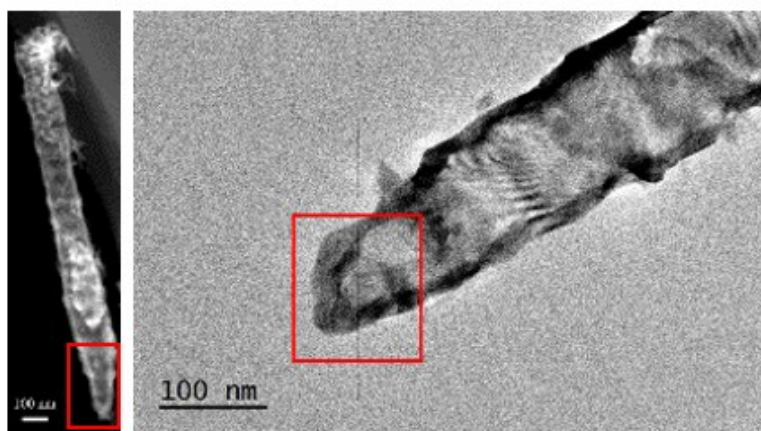

Fig. S1 TEM images of single TiO<sub>2</sub> nanotube

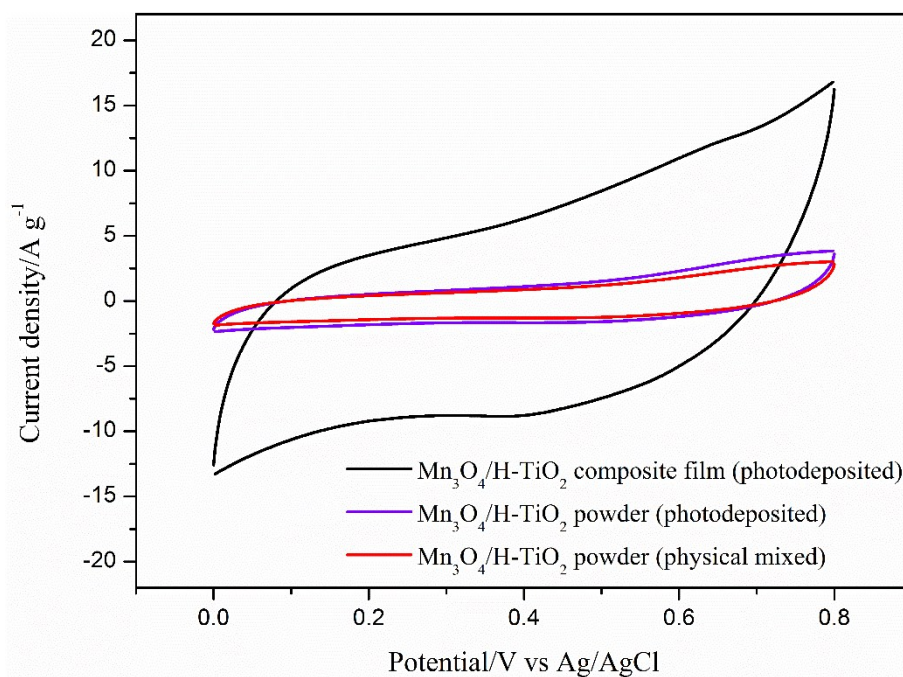

Fig. S2 CV curves of  $\text{Mn}_3\text{O}_4/\text{H-TiO}_2$  composite film electrode and two pasted electrodes in 0.5 M  $\text{Na}_2\text{SO}_4$  aqueous solution at a scan rate of  $50 \text{ mV s}^{-1}$ . The two pasted electrodes using as-photodeposited  $\text{Mn}_3\text{O}_4/\text{H-TiO}_2$  powders peeled from substrate and  $\text{Mn}_3\text{O}_4/\text{H-TiO}_2$  powders physically mixed were fabricated by coating a slurry containing 70 wt% active materials, 15 wt% acetylene black (Super-P), and 15 wt% polyvinylidene fluoride (PVDF) dissolved in N-methyl-2-pyrrolidinone onto Ti foil, and dried at  $80^\circ\text{C}$  in vacuum for 12 h.

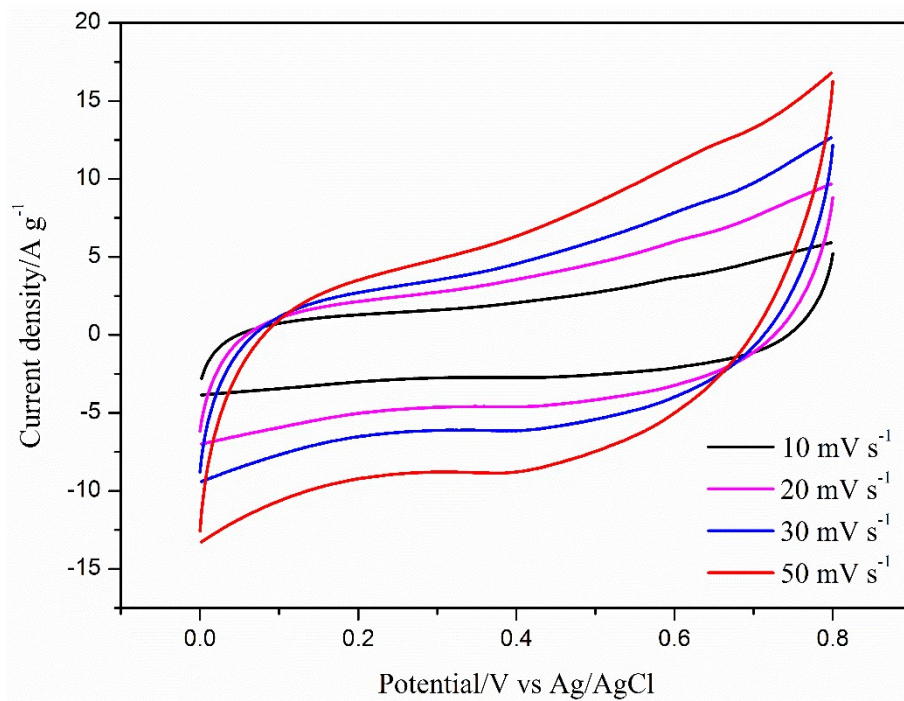

Fig. S3 CV curves of Mn<sub>3</sub>O<sub>4</sub>/H-TiO<sub>2</sub> composite films at different scan rates

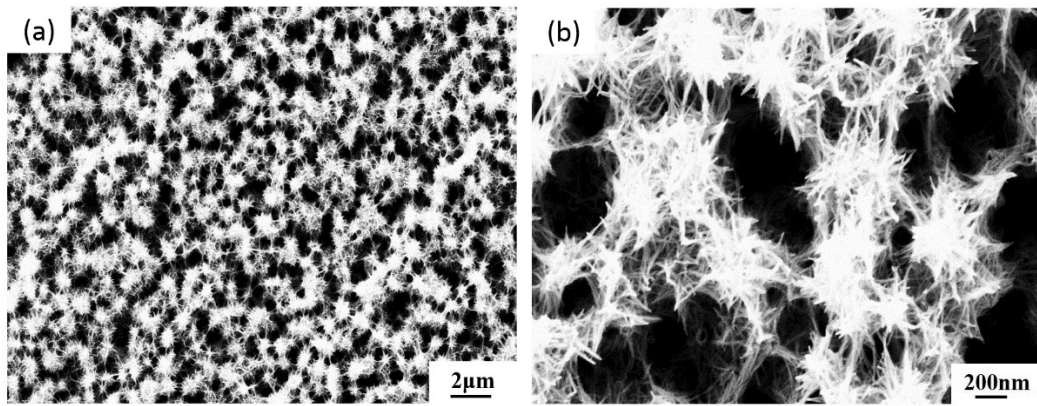

Fig. S4 SEM images of  $\text{Mn}_3\text{O}_4/\text{H-TiO}_2$  composite film electrode after 10000 cycles at a current density of  $3.6 \text{ A g}^{-1}$

Table S1 Comparison of the pseudocapacitive performance of MnO<sub>x</sub> based materials in this work and some references

| Materials                                                                            | Preparation method        | Specific capacitance/rate                                                                      | Cycle performance<br>Final capacity/cycle number/rate |
|--------------------------------------------------------------------------------------|---------------------------|------------------------------------------------------------------------------------------------|-------------------------------------------------------|
| Mn <sub>3</sub> O <sub>4</sub> /H-TiO <sub>2</sub><br>nanotube arrays<br>(this work) | Photodeposition           | 508 F g <sup>-1</sup> /0.7 A g <sup>-1</sup><br>228 F g <sup>-1</sup> /35.7 A g <sup>-1</sup>  | 329 F g <sup>-1</sup> /10000/3.6 A g <sup>-1</sup>    |
| Mn <sub>3</sub> O <sub>4</sub> /graphene<br>nanocomposites <sup>1</sup>              | Precipitation             | 238 F g <sup>-1</sup> /0.1 A g <sup>-1</sup><br>146 F g <sup>-1</sup> /2 A g <sup>-1</sup>     | 137 F g <sup>-1</sup> /1000/2 A g <sup>-1</sup>       |
| TiO <sub>2</sub> nanobelts@MnO <sub>2</sub><br>arrays <sup>2</sup>                   | Hydrothermal method       | 455 F g <sup>-1</sup> /0.2 A g <sup>-1</sup><br>54 F g <sup>-1</sup> /2 A g <sup>-1</sup>      | ~450 F g <sup>-1</sup> /900/0.2 A g <sup>-1</sup>     |
| Mn <sub>3</sub> O <sub>4</sub> nanosheets <sup>3</sup>                               | Chemical deposition       | 398 F g <sup>-1</sup> /5 mV s <sup>-1</sup><br>~290 F g <sup>-1</sup> /100 mV s <sup>-1</sup>  | ~238 F g <sup>-1</sup> /2000/100 mV s <sup>-1</sup>   |
| Mn <sub>3</sub> O <sub>4</sub> /CNT composite<br>arrays <sup>4</sup>                 | Dip-casting method        | 299 F g <sup>-1</sup> /2 mV s <sup>-1</sup><br>~150 F g <sup>-1</sup> /200 mV s <sup>-1</sup>  | ~180 F g <sup>-1</sup> /1000/50 mV s <sup>-1</sup>    |
| MnO <sub>2</sub> /PDDA/ONCNO<br>composites <sup>5</sup>                              | Chemical deposition       | 219 F g <sup>-1</sup> /2 A g <sup>-1</sup>                                                     | ~177 F g <sup>-1</sup> /1000/2 A g <sup>-1</sup>      |
| MnO <sub>2</sub> /TiN nanotube<br>coaxial arrays <sup>6</sup>                        | Electrodeposition         | 486 F g <sup>-1</sup> /2 mV s <sup>-1</sup><br>267 F g <sup>-1</sup> /2000 mV s <sup>-1</sup>  | ~359 F g <sup>-1</sup> /1000/200 mV s <sup>-1</sup>   |
| Mn <sub>3</sub> O <sub>4</sub><br>nanocubes/graphene <sup>7</sup>                    | Chemical<br>decomposition | 131 F g <sup>-1</sup> /0.5 A g <sup>-1</sup><br>86 F g <sup>-1</sup> /5 A g <sup>-1</sup>      | ~85 F g <sup>-1</sup> /500/5 A g <sup>-1</sup>        |
| MnO <sub>2</sub><br>nanoneedles/graphene <sup>8</sup>                                | Dipping coating           | 367 F g <sup>-1</sup> /10 mV s <sup>-1</sup><br>~290 F g <sup>-1</sup> /500 mV s <sup>-1</sup> | ~311 F g <sup>-1</sup> /1000/10 mV s <sup>-1</sup>    |
| Mn <sub>3</sub> O <sub>4</sub><br>nanoparticles/ITO <sup>9</sup>                     | Chemical deposition       | 403 F g <sup>-1</sup> /10 mV s <sup>-1</sup><br>202 F g <sup>-1</sup> /200 mV s <sup>-1</sup>  | ~264 F g <sup>-1</sup> /5000/100 mV s <sup>-1</sup>   |
| Mn <sub>3</sub> O <sub>4</sub> /graphene <sup>10</sup>                               | Hydrothermal<br>synthesis | 367 F g <sup>-1</sup> /5 A g <sup>-1</sup>                                                     | 337 F g <sup>-1</sup> /3000/5 A g <sup>-1</sup>       |
| Porous MnO/Mn <sub>3</sub> O <sub>4</sub><br>nanocomposite <sup>11</sup>             | Thermal<br>decomposition  | 207 F g <sup>-1</sup> /1 A g <sup>-1</sup><br>172 F g <sup>-1</sup> /20 A g <sup>-1</sup>      | 143 F g <sup>-1</sup> /3000/20 A g <sup>-1</sup>      |

|                                                                              |                           |                                                                                             |                                                  |
|------------------------------------------------------------------------------|---------------------------|---------------------------------------------------------------------------------------------|--------------------------------------------------|
| 3D Mn <sub>3</sub> O <sub>4</sub> hierarchical<br>architecture <sup>12</sup> | Hydrothermal<br>synthesis | 229 F g <sup>-1</sup> /0.1 A g <sup>-1</sup><br>82 F g <sup>-1</sup> /0.5 A g <sup>-1</sup> | 87 F g <sup>-1</sup> /1000/0.5 A g <sup>-1</sup> |
|------------------------------------------------------------------------------|---------------------------|---------------------------------------------------------------------------------------------|--------------------------------------------------|

## References

1. F. Gao, J. Qu, Z. Zhao, Q. Zhou, B. Li and J. Qiu, *Carbon*, 2014, **80**, 640–650.
2. Y. Luo, D. Kong, J. Luo, S. Chen, D. Zhang, K. Qiu, X. Qi, H. Zhang, C. M. Li and T. Yu, *RSC Adv.*, 2013, **3**, 14413–14422.
3. D. P. Dubal and R. Holze, *J. Power Sources*, 2013, **238**, 274–282.
4. X. Cui, F. Hu, W. Wei and W. Chen, *Carbon*, 2011, **49**, 1225–1234.
5. R. Borgohain, J. P. Selegue and Y.-T. Cheng, *J. Mater. Chem. A*, 2014, **2**, 20367–20373.
6. S. M. Dong, X. Chen, L. Gu, X. H. Zhou, L. F. Li, Z. H. Liu, P. X. Han, H. X. Xu, J. H. Yao, H. B. Wang, X. Y. Zhang, C. Q. Shang, G. L. Cui and L. Q. Chen, *Energy Environ. Sci.*, 2011, **4**, 3502–3508.
7. K. Subramani, D. Jeyakumar and M. Sathish, *Phys. Chem. Chem. Phys.*, 2014, **16**, 4952–4961.
8. M. Kim, Y. Hwang and J. Kim, *Phys. Chem. Chem. Phys.*, 2014, **16**, 351–361.
9. I. Ryu, G. Kim, D. Park and S. Yim, *J. Power Sources*, 2015, **297**, 98–104.
10. H. M. Lee, G. H. Jeong, D. W. Kang, S. W. Kim and C. K. Kim, *J. Power Sources*, 2015, **281**, 44–48.
11. J. H. Yang, X. F. Yang, Y. L. Zhong and J. Y. Ying, *Nano Energy*, 2015, **13**, 702–708.
12. Z. X. Liu, Y. Xing, S. M. Fang, X. W. Qu, D. P. Wu, A. Q. Zhang and B. Xu, *RSC Adv.*, 2015, **5**, 54867–54872.
